# Supplementary material for: An RGH–MOF as a naked eye colorimetric fluorescent sensor for picric acid recognition
Source: Royal Society of Chemistry journal article supplement (doi:10.1039/c7tc00936d), 2017-01-01
Supplement: c7tc00936d1.pdf [file c7tc00936d1.pdf]

## Electronic Supplementary Information

### **RGH-MOF as a naked eye colorimetric fluorescent sensor for picric acid recognition**

Yihe Zhang,<sup>a,b</sup> Bin Li,<sup>a\*</sup> Heping Ma<sup>a\*</sup> Liming Zhang,<sup>a</sup> Wenxiang Zhang<sup>a,b</sup>

*<sup>a</sup>State Key Laboratory of Luminescence and Applications, Changchun  
Institute of Optics Fine Mechanics and Physics, Chinese Academy of  
Sciences, Changchun 130033, P. R. China*

*<sup>b</sup>University of Chinese Academy of Sciences, Beijing 100039, P. R. China*

*E-mail: libinteacher@163.com (B. Li)*

*mahp@ciomp.ac.cn (H. Ma)*

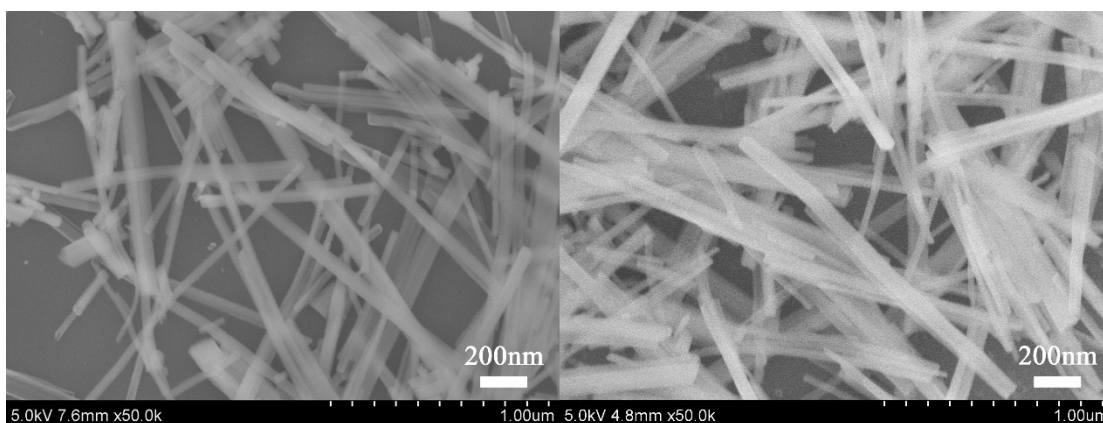

**Fig. S1.** SEM images of (a) Eu(BTC) and (b) RGH-Eu(BTC).

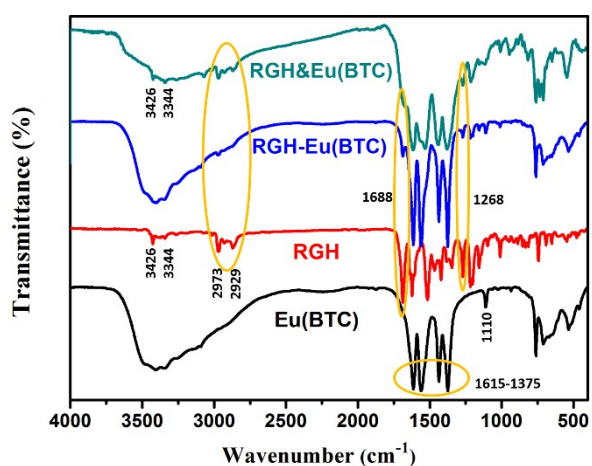

**Fig. S2.** FTIR spectra of Eu(BTC), RGH, RGH-Eu(BTC) and RGH&Eu(BTC).

**Table S1.** Elemental analyses of RGH-Eu(BTC)

| Sample      | C (wt%) | N (wt%) |
|-------------|---------|---------|
| Eu(BTC)     | 23.44   | 0.29    |
| RGH-Eu(BTC) | 31.41   | 1.77    |

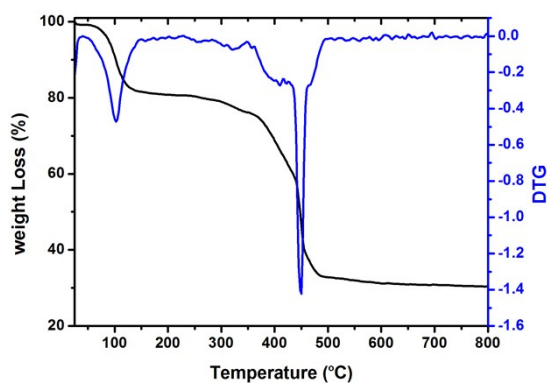

**Fig. S3.** Thermogravimetric curve of RGH-Eu(BTC).

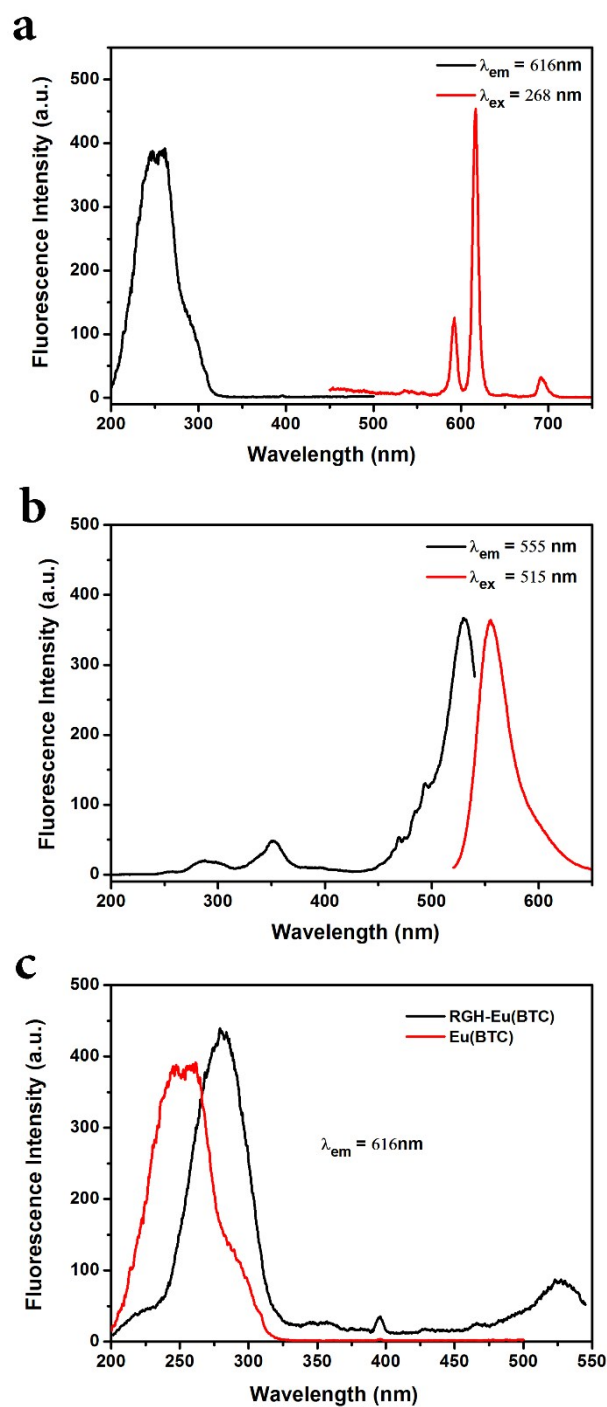

**Fig. S4.** The fluorescent excitation and emission spectra of (a) Eu(BTC); and (b) RGH+PA. (c) Fluorescent excitation of Eu(BTC) and RGH-Eu (BTC).

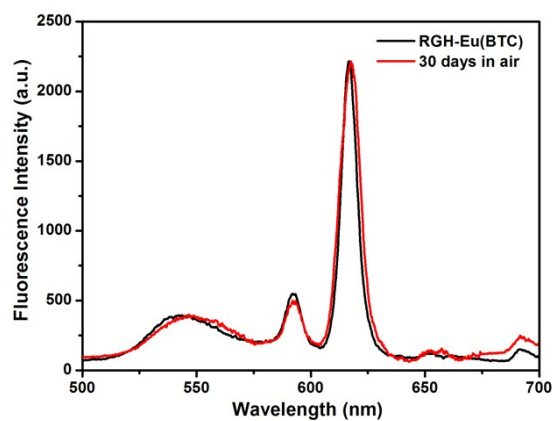

**Fig. S5.** Fluorescence spectra of the original RGH-Eu(BTC) (black line) and exposed in air for 30 days (red line).

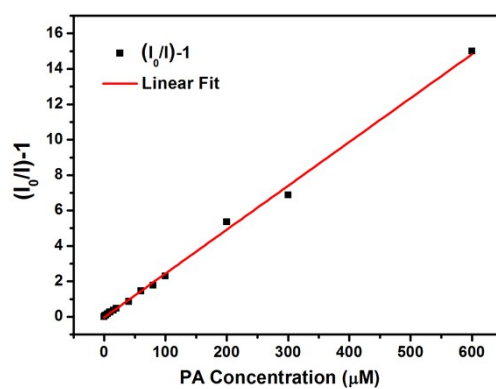

**Fig. S6.** The linear response of the integrated intensity of Eu(BTC) and PA concentration, excited at 285 nm.

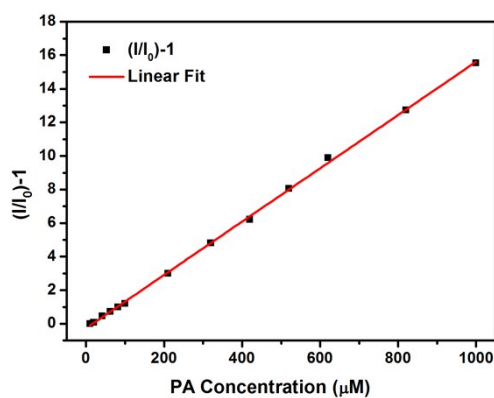

**Fig. S7.** The linear response of the integrated intensity of RGH and PA concentration, excited at 510 nm.

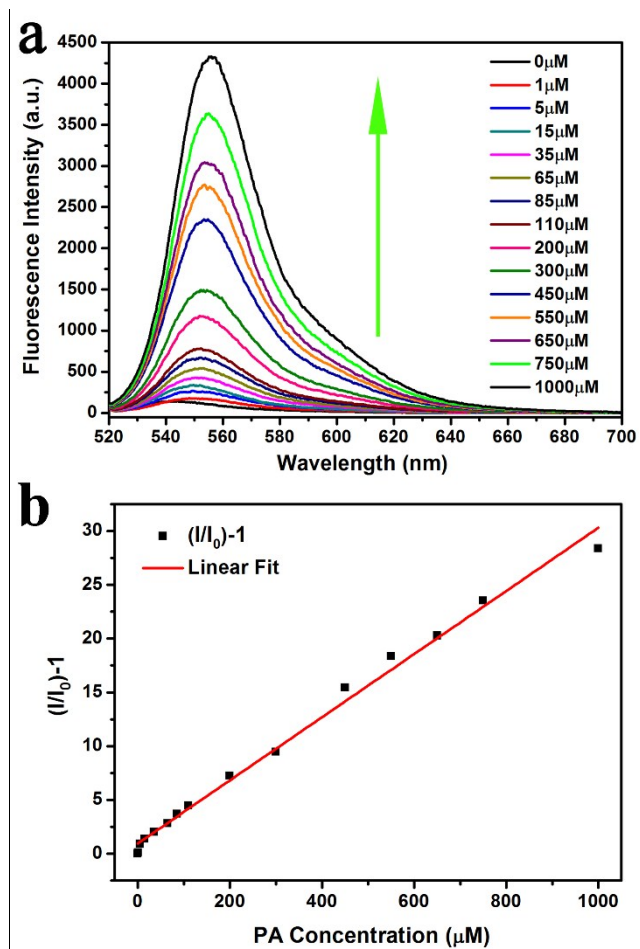

**Fig. S8.** (a) Fluorescence spectra of RGh-Eu(BTC) with different concentrations of PA when excited at 510 nm. (b) Corresponding linear fitting plot of RGh-Eu(BTC).

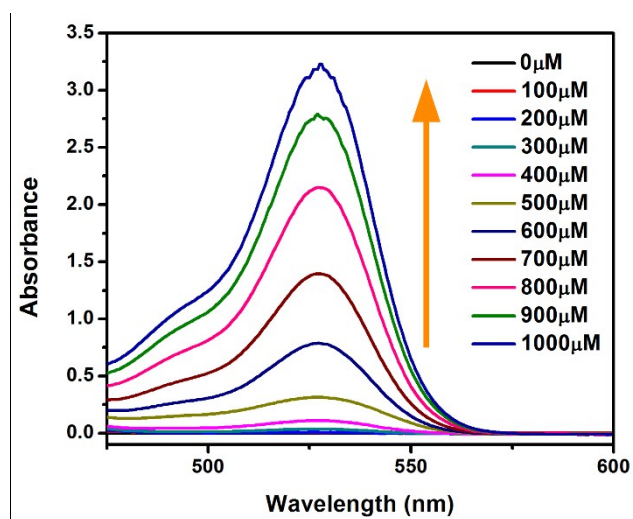

**Fig. S9.** Absorption spectra of RGh (50  $\mu$ M) in the presence of various concentration of PA.

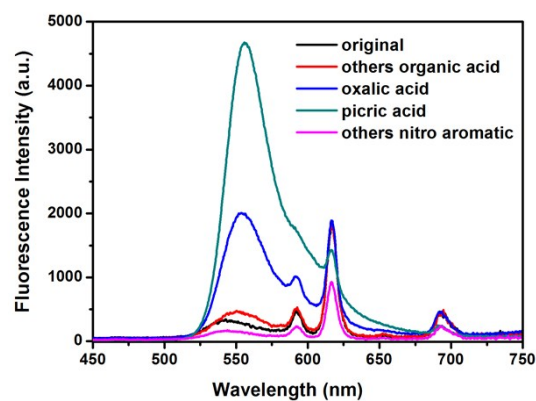

**Fig. S10.** Emission spectra of RGH-Eu(BTC) (0.05 mg/mL) in the presence of equivalent PA and various analytes in ethanol.

**Table S2.** Average values and RSD data of  $I_{555}/I_{616}$  upon addition of different analytes

|         | Addition individual                |               | Coexistence with PA                |               |
|---------|------------------------------------|---------------|------------------------------------|---------------|
|         | Average value of $I_{555}/I_{616}$ | RSD (n=3) (%) | Average value of $I_{555}/I_{616}$ | RSD (n=3) (%) |
| Blank   | 0.21391                            | 9.822         | 0.21391                            | 2.878         |
| Ac      | 0.25641                            | 6.688         | 0.25641                            | 2.01          |
| Ox      | 1.05449                            | 2.669         | 1.05449                            | 3.436         |
| Ma      | 0.312                              | 6.7665        | 0.312                              | 3.038         |
| phenol  | 0.20253                            | 9.4075        | 0.20253                            | 2.968         |
| BA      | 0.24578                            | 10.443        | 0.24578                            | 4.502         |
| 4-NT    | 0.36831                            | 6.5865        | 0.36831                            | 5.662         |
| Cl-NB   | 0.19485                            | 7.975         | 0.19485                            | 2.63          |
| 2,4-DNT | 0.19374                            | 12.1015       | 0.19374                            | 2.182         |
| NB      | 0.29367                            | 8.7095        | 0.29367                            | 6.228         |
| 3-NP    | 0.22916                            | 9.4205        | 0.22916                            | 2.612         |
| TNT     | 0.23782                            | 8.0015        | 0.23782                            | 3.796         |

**Table S3.** HOMO and LUMO energies for several electron deficient nitro aromatic calculated by density functional theory at B3LYP/6- 31G\* level.

| Analytes | HOMO (eV) | LUMO (eV) | Band gap (eV) |
|----------|-----------|-----------|---------------|
| NT       | -7.68     | -2.789    | 4.891         |
| Cl-NB    | -7.862    | -3.105    | 4.757         |
| 2,4-DNT  | -8.0139   | -2.9607   | 5.0532        |
| NB       | -7.587    | -2.425    | 5.162         |
| 3-NP     | -7.223    | -2.969    | 4.254         |
| TNT      | -8.3350   | -3.5729   | 4.7621        |
| PA       | -8.2915   | -3.8750   | 4.4165        |

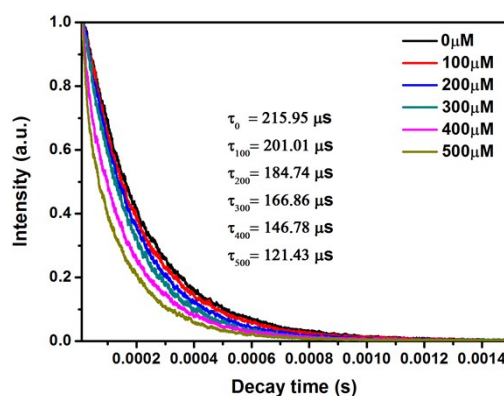

**Fig. S11.** Fluorescence decay curve of Eu(BTC) upon addition of PA.

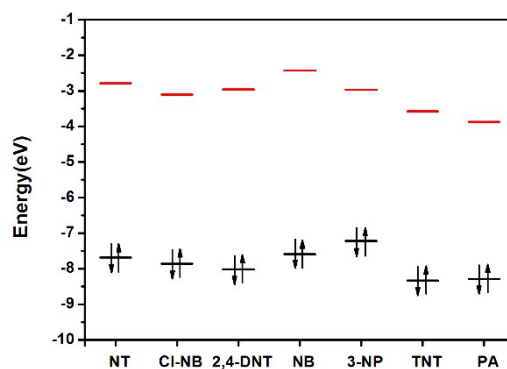

**Fig. S12.** HOMO and LUMO energies for several electron deficient nitro aromatic.

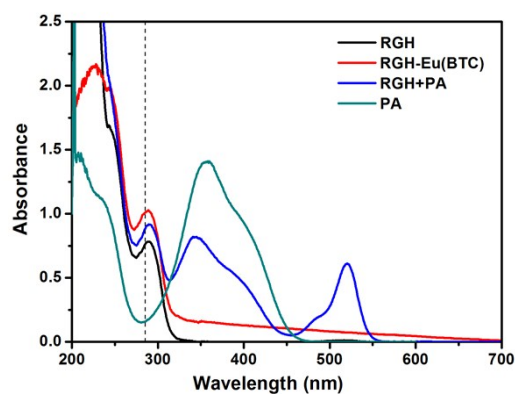

**Fig. S13.** The absorption spectra of RGH, RGH-Eu(BTC), RGH+PA and PA.

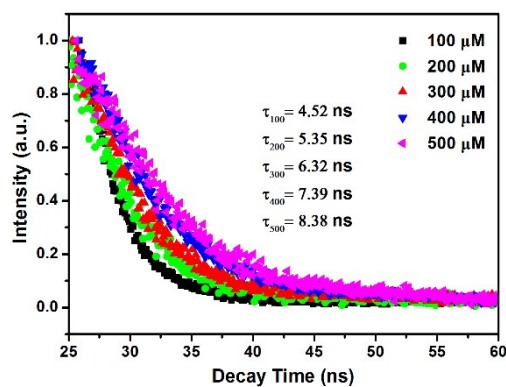

**Fig. S14.** Fluorescence decay curves of RGH with different PA concentration (100-500  $\mu\text{M}$ ), excited at 285 nm.

**Table S4.** The pKa values of organic acids in this work.

| Acids       | pKa  | Acids        | pKa  |
|-------------|------|--------------|------|
| Picric acid | 0.38 | Acetic acid  | 4.76 |
| Oxalic acid | 1.25 | Malonic acid | 2.83 |
| Phenol      | 9.95 | Benzoic acid | 4.19 |
